# Supplementary material for: Identification of Triazolopyrimidinyl Scaffold SARS-CoV-2 Papain-Like Protease (PLpro) Inhibitor
Source: MDPI journal article supplement (doi:10.3390/pharmaceutics16020169), 2024-01-25
Supplement: s1 [file s1]

# Supplementary Materials

## for

# Identification of Triazolopyrimidinyl Scaffold SARS-CoV-2 Papain-Like Protease (PL<sup>pro</sup>) Inhibitor

Sebastjan Kralj <sup>1</sup>, Marko Jukič <sup>1,2,3,\*</sup>, Miha Bahun <sup>4</sup>, Luka Kranjc <sup>4,5</sup>, Anja Kolarič <sup>1</sup>, Milan Hodošek <sup>6</sup>, Nataša Poklar Ulrih <sup>4</sup> and Urban Bren <sup>1,2,3,\*</sup>

<sup>1</sup> Faculty of Chemistry and Chemical Engineering, University of Maribor, Smetanova Ulica 17, SI-2000 Maribor, Slovenia; sebastjan.kralj1@um.si (S.K.); anja.kolaric2@um.si (A.K.)

<sup>2</sup> Faculty of Mathematics, Natural Sciences and Information Technologies, University of Primorska, Glagoljaška Ulica 8, SI-6000 Koper, Slovenia

<sup>3</sup> Institute of Environmental Protection and Sensors, Beloruska Ulica 7, SI-2000 Maribor, Slovenia

<sup>4</sup> Biotechnical Faculty, University of Ljubljana, Jamnikarjeva 101, SI-1000 Ljubljana, Slovenia; miha.bahun@bf.uni-lj.si (M.B.); luka.kranjc@nib.si (L.K.); natasa.poklar@bf.uni-lj.si (N.P.U.)

<sup>5</sup> National Institute of Biology, Večna Pot 111, SI-1000 Ljubljana, Slovenia

<sup>6</sup> National Institute of Chemistry, Hajdrihova 19, SI-1000 Ljubljana, Slovenia; milan@cmm.ki.si

\* Correspondence: marko.jukic@um.si (M.J.); urban.bren@um.si (U.B.)

Table of Interactions

**Table S1.** Key interactions responsible for GRL0617 binding with SARS-CoV-2 PL<sup>pro</sup>.

| Bond type                          | Amino-Acid residue (PL <sup>pro</sup> ) | Atom number (GRL0617) | Distance (Å) | Angle (°) |
|------------------------------------|-----------------------------------------|-----------------------|--------------|-----------|
| Hydrophobic interaction            | P247                                    | C12                   | 3.73         | /         |
|                                    | P248                                    | C14                   | 3.76         | /         |
|                                    | Y264                                    | C14                   | 3.67         | /         |
|                                    | Y268                                    | C13                   | 3.50         | /         |
|                                    | Y268                                    | C20                   | 3.86         | /         |
| Hydrogen bond                      | D164(O)                                 | N2 (amid)             | 2.82         | 118.6     |
|                                    | Y268(OH)                                | N01                   | 3.43         | 129.54    |
|                                    | Q269(N, backbone)                       | O7                    | 3.14         | 146.54    |
| T-shaped $\pi$ - $\pi$ interaction | Y268                                    | Naphthalene group     | 4.73         | 72.75     |

## Minimization of the Open PL<sup>pro</sup> Conformation

This was achieved using the CHARMM-GUI Solution Builder for the molecular dynamics program CHARMM<sup>34,57</sup>. Minimization included 50 steps of Steepest Descent (SD) and 500 steps of Adopted basis Newton-Raphson (ABNR), with a further 1 ns equilibration equilibration with the NVT ensemble applied, the temperature was set at 310.15 K using the HOOVER thermostat and the integration time-step set at 1fs. VDW interactions were cutoff between 10-12 Å using the force switch method (VFSWitch). For the calculation of electrostatic interactions, the particle-mesh Ewald summation was used, bonds to hydrogens were constrained using the SHAKE algorithm and the CHARMM 36m force-field was used.

## ROC Study

To ensure the best docking protocol was used on the full library, the docking program CmDock (<https://gitlab.com/Jukic/cmdock/>) was tested on a subset of compounds. This included a random selection of a 1000 decoy drug-like molecules with the average molecular weight of 400 Da, and fifteen known non-covalent inhibitors with structural information deposited on the PDB (Supplementary-Table S2). The structure of the open conformation (PDB ID: 7CJM) and the closed conformation (PDB ID: 6WX4) were selected with all docking calculations, with the binding site prepared separately in each of the chosen programs. Using the Cmcavity (<https://gitlab.com/Jukic/cmdock/>) program, the binding site was defined automatically around the coordinates of the co-crystallized ligand (GRL0617). The generated .grd file was inspected in PyMol to ensure that the binding site has been defined correctly.

Closed PLpro conformation docking cavity:

Total volume 5627.75 Å<sup>3</sup>

Cavity #1 Size=45022 points; Vol=5627.75 Å<sup>3</sup>; Min=(-7.5,11.5,-13); Max=(19.5,39.5,10); Center=(4.66316,25.1299,-2.88701); Extent=(27,28,23)

Cav = 45022; total = 45022

Open PLpro conformation docking cavity

Total volume 5557 Å<sup>3</sup>

Cavity #1 Size=44456 points; Vol=5557 Å<sup>3</sup>; Min=(-7.5,11.5,-13); Max=(19.5,39.5,10.5); Center=(4.49022,25.1067,-2.85059); Extent=(27,28,23.5)

Cav = 44456; total = 44456

The docking protocol used was defined in the docking parameter file, and was as follows:

|                                |                  |
|--------------------------------|------------------|
| RBT_PARAMETER_FILE_V1.00       | VOL_INCR 0.0     |
| TITLE GRL0617 docking to Plpro | GRIDSTEP 0.5     |
|                                | END_SECTION      |
| #cavity                        |                  |
| SECTION MAPPER                 | #restraint       |
| SITE_MAPPER                    | SECTION CAVITY   |
| RbtLigandSiteMapper            | SCORING_FUNCTION |
| REF_MOL GRL0617_7cjm.sdf       | RbtCavityGridSF  |
| RADIUS 10.0                    | WEIGHT 1.0       |
| SMALL_SPHERE 1.0               | END_SECTION      |
| MIN_VOLUME 100                 | #end restraint   |
| MAX_CAVITIES 1                 |                  |

## ROC Curves for docking protocol

Custom KNIME software workflows for ROC curve generation were used for both the open and closed conformation and on all three docking programs, resulting in a total of 6 ROC curves. As stated earlier the results among the docking programs were comparable, and CmDock was chosen based on its speed and ease of use.

**Table S2:** Table of known inhibitors for SARS-CoV-PLpro

| Molecule name IUPAC                                                                                                                | Chemical formula/ name        | PDB ID | Reference                    |
|------------------------------------------------------------------------------------------------------------------------------------|-------------------------------|--------|------------------------------|
| 5-amino-2-methyl-N-[(1R)-1-naphthalen-1-ylethyl]benzamide                                                                          | C20 H20 N2 O<br>GRL0617       | 7CJM   | Fu et. al                    |
| 1-(2-methoxyethyl)-2-methyl-3-(pyrazin-2-ylmethyl)benzo[f]benzimidazol-3-ium-4,9-dione                                             | C20 H19 N4 O3<br>YM155        | 7D7L   | Zhao et al. <sup>58</sup>    |
| N-[(3-acetamidophenyl)methyl]-1-[(1R)-1-naphthalen-1-ylethyl]piperidine-4-carboxamide                                              | C27 H31 N3 O2<br>Compound S43 | 7E35   | Shan et al. <sup>59</sup>    |
| 5-[(carbamoylcarbamoyl)amino]-2-methyl-N-[(1R)-1-(naphthalen-1-yl)ethyl]benzamide                                                  | C22 H22 N4 O3<br>Snyder 495   | 7JIT   | Osipiuk et al. <sup>12</sup> |
| 5-(acryloylamino)-2-methyl-N-[(1R)-1-(naphthalen-1-yl)ethyl]benzamide                                                              | C23 H22 N2 O2<br>Snyder530    | 7JIW   | Osipiuk et al. <sup>12</sup> |
| 3-amino-2-methyl-N-[(1R)-1-(naphthalen-1-yl)ethyl]benzamide                                                                        | C20 H20 N2 O<br>Snyder441     | 7JN2   | Osipiuk et al. <sup>12</sup> |
| 5-[(E)-(hydroxyimino)methyl]-2-methyl-N-[(1R)-1-(naphthalen-1-yl)ethyl]benzamide                                                   | C21 H20 N2 O2,<br>Snyder496   | 7KOL   | Osipiuk et al. <sup>12</sup> |
| 5-[(azetidin-3-yl)amino]-N-[(1R)-1-{3-[5-(((1S,3R)-3-hydroxycyclopentyl)amino)methyl]thiophen-2-yl}phenyl]ethyl]-2-methylbenzamide | C29 H36 N4 O2 S<br>XR8-89     | 7LBR   | Ratia et al.                 |
| 5-[(azetidin-3-yl)amino]-2-methyl-N-[(1R)-1-(3-{5-[(pyrrolidin-1-yl)methyl]thiophen-2-yl}phenyl)ethyl]benzamide                    | C28 H34 N4 O S<br>XR8-24      | 7LBS   | Ratia et al.                 |
| 5-[(azetidin-3-yl)amino]-N-[(1R)-1-{3-[5-(((1R,3S)-3-hydroxycyclopentyl)amino)methyl]thiophen-2-yl}phenyl]ethyl]-2-methylbenzamide | C29 H36 N4 O2 S<br>XR8-83     | 7LLF   | Ratia et al.                 |
| N-[(1R)-1-(3-{5-[(acetylaminomethyl]thiophen-2-yl}phenyl)ethyl]-5-[(azetidin-3-yl)amino]-2-methylbenzamide                         | C26 H30 N4 O2 S<br>XR8-69     | 7LLZ   | Ratia et al.                 |
| 5-(azetidin-3-ylamino)-2-methyl-~{N}-[(1~{R})-1-[3-[5-[[[(3~{R})-oxolan-3-yl]amino)methyl]thiophen-2-yl}phenyl]ethyl]benzamide     | C28 H34 N4 O2 S<br>XR8-65     | 7LOS   | Ratia et al.                 |
| (1R)-N-[(1H-indol-3-yl)methyl]-N-methyl-1-(naphthalen-1-yl)ethan-1-amine                                                           | C22 H22 N2<br>Jun9-84-3       | 7RZC   | Osipiuk et al. <sup>12</sup> |
| 4-({methyl[(1R)-1-(naphthalen-1-yl)ethyl]amino)methyl}phenol                                                                       | C20 H21 N O<br>Jun9-72-2      | 7SDR   | Osipiuk et al. <sup>12</sup> |
| 5-amino-N-(naphthalen-1-yl)pyridine-3-carboxamide                                                                                  | C16 H13 N3 O<br>Snyder608     | 7SGU   | Osipiuk et al. <sup>12</sup> |
| N-(naphthalen-1-yl)pyridine-3-carboxamide                                                                                          | C16 H12 N2 O<br>Snyder630     | 7SGW   | Osipiuk et al. <sup>12</sup> |

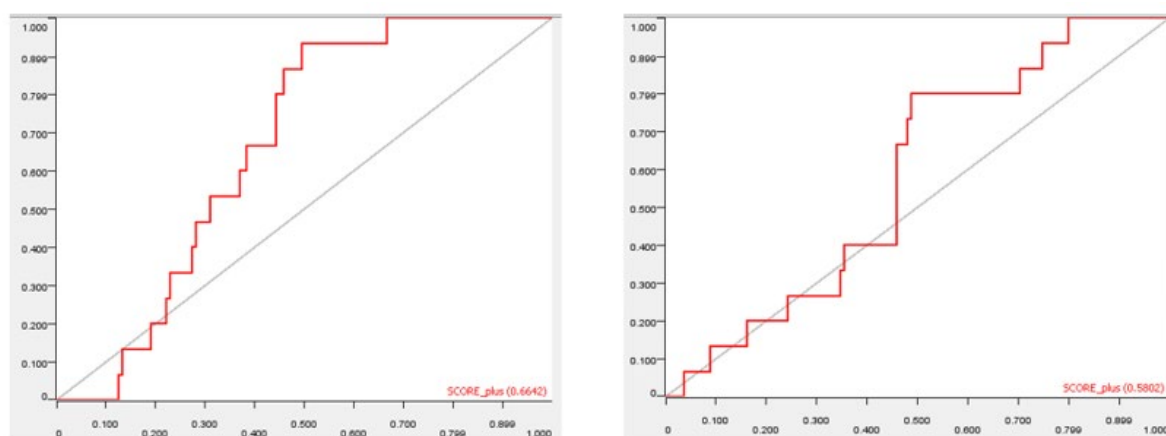

Figure S1: ROCs curves for conformations of the PLpro protein target

Table S3: MD results for selected docking hits

| Compound name | Structure |
|---------------|-----------|
| Hit 903       |           |
| Hit 922       |           |
| GRL 0617      |           |
| Hit 826       |           |
| Hit 372       |           |

Table S4: RMSD for selected inhibitors during MD calculations

| Compounds ID | Average RMSD 1 $\pm$ SD[Å] | Average RMSD 2 $\pm$ SD[Å] | RMSD protein                                                                        | RMSD ligand                                                                           |
|--------------|----------------------------|----------------------------|-------------------------------------------------------------------------------------|---------------------------------------------------------------------------------------|
| Hit 903      | 1.313 $\pm$ 0.208          | 1.316 $\pm$ 0.105          | 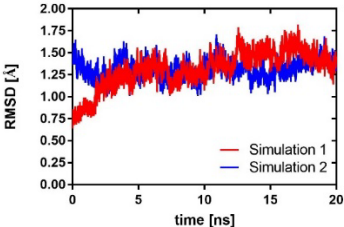   |    |
| Hit 922      | 0.691 $\pm$ 0.051          | 0.837 $\pm$ 0.080          |    |    |
| GRL 0617     | 2.166 $\pm$ 0.399          | 2.478 $\pm$ 0.165          |   |   |
| Hit 826      | 1.302 $\pm$ 0.131          | 1.280 $\pm$ 0.110          |  |  |
| Hit 372      | 1.276 $\pm$ 0.144          | 1.369 $\pm$ 0.099          |  |  |

**Table S5:** Oligonucleotide sequences used in this study.

| DNA primer | Sequence (from 5' to 3')                                      |
|------------|---------------------------------------------------------------|
| P1         | gtttaactttaagaaggagatatacatatggaagtgaggactattaaggtgtttacaacag |
| P2         | ctcagtgggtgggtgggtgctcgagtttatggtgtgtgtaactgtttcttttagaaaaac  |
| P3         | ctcgagcaccaccaccac                                            |
| P4         | cagttattaccattgaaaaaggaagagtctgcaggcatcgtggtgtcac             |
| P5         | caggaagattgtataagcaaataatttctgcagcaatggcaacaacgttcgcgc        |
| P6         | catatgtatatctccttcttaaagttaaacaaaattatttctagaggg              |
| P7         | gacgagcgtgacaccacgatgcctgcagactctccttttcaatgggtaataactg       |
| P8         | gttgttgccattgctgcagaaatatttgcttatacaatctcctgttttggg           |
| P9         | gtttaactttaagaaggagatatacatatggaagtgaggactattaaggtgtttacaacag |
| P10        | aaaacatatgtatatctccttcttaaagttaaacaaaattatttctagaggg          |
